# Supplementary material for: Physical activity trails in an urban setting and cardiovascular disease morbidity and mortality in Winnipeg, Manitoba, Canada: a study protocol for a natural experiment
Source: PubMed Central journal article supplement — BMJ Open. 2020 Feb 18;10(2):e036602. doi: 10.1136/bmjopen-2019-036602 (PMC7045157; doi:10.1136/bmjopen-2019-036602), 2020-02-18
Supplement: bmjopen-2019-036602.reviewer_comments.pdf [file bmjopen-2019-036602.reviewer_comments.pdf]

## PEER REVIEW HISTORY

BMJ Open publishes all reviews undertaken for accepted manuscripts. Reviewers are asked to complete a checklist review form (<http://bmjopen.bmj.com/site/about/resources/checklist.pdf>) and are provided with free text boxes to elaborate on their assessment. These free text comments are reproduced below.

## ARTICLE DETAILS

|                            |                                                                                                                                                                                                    |
|----------------------------|----------------------------------------------------------------------------------------------------------------------------------------------------------------------------------------------------|
| <b>TITLE (PROVISIONAL)</b> | Physical Activity Trails in an Urban Setting and Cardiovascular Disease Morbidity and Mortality in Winnipeg, Manitoba, Canada: A Study Protocol for a Natural Experiment                           |
| <b>AUTHORS</b>             | Hobin, Erin; Swanson, Anders; Booth, Gillian; Russell, Kelly; Rosella, Laura C.; Smith, Brendan T; Manley, Ed; Isaranuwachai, Wanrudee; Whitehouse, Stephanie; Brunton, Nicole; McGavock, Jonathan |

This article was not externally reviewed at BMJ Open. Protocols that have been independently assessed prior to submission to BMJ Open are usually fast-tracked to publication on the grounds that further substantial changes will not be possible. This independent assessment will usually be external, independent review for both a substantial grant award from a non-commercial or government funder and ethics approval.
