# Supplementary material for: Physical activity trails in an urban setting and cardiovascular disease morbidity and mortality in Winnipeg, Manitoba, Canada: a study protocol for a natural experiment
Source: PubMed Central journal article supplement — BMJ Open. 2020 Feb 18;10(2):e036602. doi: 10.1136/bmjopen-2019-036602 (PMC7045157; doi:10.1136/bmjopen-2019-036602), 2020-02-18
Supplement: bmjopen-2019-036602supp001.pdf [file bmjopen-2019-036602supp001.pdf]

Appendix sTable 1. Diseases or risk factors classification and corresponding International Classification of Disease (ICD) codes, in alphabetical order.

| INDICATION                                                                              | ICD TITLE                            | ICD 10<br>CODE | ICD 9 CODE          |
|-----------------------------------------------------------------------------------------|--------------------------------------|----------------|---------------------|
| <b>Diagnoses indicative of a cardiovascular disease endpoint – Primary outcome</b>      |                                      |                |                     |
| Ischemic heart disease                                                                  | Angina pectoris                      | I20            | 413                 |
|                                                                                         | Acute myocardial infarction          | I21            | 410, 434.91         |
|                                                                                         | Subsequent myocardial infarction     | I22            | 412                 |
|                                                                                         | Other acute ischaemic heart diseases | I24            | 411                 |
|                                                                                         | Chronic ischaemic heart disease      | I25            | 414                 |
|                                                                                         | Cardiac arrest                       | Cardiac arrest | I46                 |
| Heart failure                                                                           | Heart failure                        | I50            | 428                 |
| Cerebral infarction                                                                     | Cerebral infarction                  | I63            | 433, 434, 435       |
|                                                                                         | Stroke                               | I64            | 437.0, 437.1, 437.3 |
| <b>Diagnoses indicative of a cardiovascular disease risk factor – Secondary Outcome</b> |                                      |                |                     |
| Diabetes                                                                                | Diabetes                             | E11            | 250                 |
| Hyperlipidemia                                                                          | Dyslipidemia                         | E78            | 272.3, 272.5, 272.6 |
|                                                                                         |                                      |                | 272.6               |
| Hyperlipidemia                                                                          | Pure hypercholesterolaemia           | E78.0          | 272.0               |
|                                                                                         | Pure hyperglyceridaemia              | E78.1          | 272.1               |
|                                                                                         | Mixed hyperlipidaemia                | E78.2          | 272.2               |
|                                                                                         | Hyperlipidaemia, unspecified         | E78.5          | 272.4               |
| Hypertension                                                                            | Essential (primary) hypertension     | I10            | 401, 459.3          |
|                                                                                         | Hypertensive heart disease           | I11            | 402                 |

|                                                                                                           |                                                    |            |                                          |
|-----------------------------------------------------------------------------------------------------------|----------------------------------------------------|------------|------------------------------------------|
|                                                                                                           | Hypertensive renal disease                         | I12        | 403                                      |
|                                                                                                           | Hypertensive heart and renal disease               | I13        | 404                                      |
| <b>Diagnoses leading to exclusion from the cohort</b>                                                     |                                                    |            |                                          |
| Cardiomyopathy                                                                                            | Endocardial fibroelastosis                         | I42.4      | 425.3                                    |
|                                                                                                           | Endomyocardial disease                             | I42.3      | 425.0                                    |
|                                                                                                           | Congenital cardiomyopathy                          | I42.8      | Not applicable                           |
|                                                                                                           | Familial cardiomyopathy                            | I42.9      | 425.9                                    |
| Congenital malformation of circulatory system                                                             | Congenital malformations of the circulatory system | Q20 to Q28 | 745, 746, 747, 759.9                     |
|                                                                                                           |                                                    | E84        | 277.0                                    |
| Cystic fibrosis                                                                                           | Cystic fibrosis                                    | E84        | 277.0                                    |
| <b>Ineligible diagnoses (not considered as outcome, but did not warrant exclusion of the participant)</b> |                                                    |            |                                          |
| Other cardiovascular problems (eg cause is viral, genetic, alcoholic, etc.)                               | Other cardiovascular problems                      | E78.7,     | 424.9, 425.2,                            |
|                                                                                                           |                                                    | E78.8      | 425.5, 425.7, 425.8, 425.9               |
| Arrhythmia*                                                                                               | Cardiac dysrhythmias                               | I49        | 427 excluding 427.5 (see Cardiac arrest) |
|                                                                                                           | Abnormalities of heart beat                        | R00 to 03  | 785.3                                    |

\*Arrhythmias were ineligible because their definition in administrative databases has not yet been validated and a local pediatric cardiologist informed us that most dysrhythmia diagnoses or referrals would not be considered cardiovascular disease or risk.
